# Supplementary material for: Improving Thermostability of GH11 Xylanase XynASP by the Design of Loop Region
Source: MDPI journal article supplement (doi:10.3390/cryst12091228), 2022-08-31
Supplement: s1 [file s1]

**Table S1.** Mutations predicted by energy-based and evolution-based approach

| Combined mutant: -14.23 kcal/mol (18 mutations) |          |           |            |                    |                 |                     |                       |
|-------------------------------------------------|----------|-----------|------------|--------------------|-----------------|---------------------|-----------------------|
| Chain                                           | Mutation | Conserved | Correlated | BTC<br>by majority | BTC<br>by ratio | FoldX<br>(kcal/mol) | Rosetta<br>(kcal/mol) |
| A                                               | T41V     | N         | N          | N                  | N               | -1.64               | -2.05                 |
| A                                               | E49T     | N         | N          | Y                  | Y               | 0.37                | -                     |
| A                                               | N54A     | N         | N          | Y                  | N               | -0.18               | -                     |
| A                                               | N63S     | N         | N          | N                  | Y               | -0.27               | -                     |
| A                                               | S66G     | N         | N          | Y                  | Y               | 0.26                | -                     |
| A                                               | A79Y     | N         | N          | N                  | N               | -1.28               | -2.11                 |
| A                                               | T81Q     | N         | N          | N                  | N               | -1.23               | -2.81                 |
| A                                               | T89N     | N         | N          | N                  | Y               | 0.43                | -                     |
| A                                               | S90P     | N         | N          | Y                  | Y               | -1.14               | 0.25                  |
| A                                               | S94G     | N         | N          | Y                  | Y               | 0.11                | -                     |
| A                                               | S106N    | N         | N          | Y                  | N               | —2                  | -                     |
| A                                               | L114V    | N         | N          | Y                  | Y               | 0.22                | -                     |
| A                                               | A125G    | N         | N          | Y                  | N               | 0.00                | -                     |
| A                                               | G126A    | N         | N          | Y                  | N               | -0.84               | -                     |
| A                                               | S131T    | N         | N          | Y                  | N               | 0.27                | -                     |
| A                                               | Y133T    | N         | N          | Y                  | Y               | 0.40                | -                     |
| A                                               | T143M    | N         | N          | N                  | N               | -1.27               | -6.55                 |
| A                                               | T145Y    | N         | N          | N                  | N               | -1.20               | -3.14                 |

**Table S2.** sequences of mutated primers

| primer      | Sequence (5' - 3')                                         |
|-------------|------------------------------------------------------------|
| T41V-F      | TACTACTCCTTCTGG <u>GT</u> TGATGGTGCAAGCGGA                 |
| T41V-R      | TCCGCTTGCACCATCA <u>AAC</u> CCAGAAGGAGTA GTA               |
| A79Y-F      | TGGAATCCGGGCAGTT <u>TAT</u> AGAACCATCACGTAC                |
| A79Y-R      | GTACGTGATGGTTCT <u>ATA</u> ACTGCCCCGGATTCCA                |
| T81Q-F      | CCGGGCAGTGCCAGAC <u>AG</u> ATCACGTACTCCGGC                 |
| T81Q-R      | GCCGGAGTACGTGATC <u>TGT</u> CTGGCACTGCCCCGG                |
| A79Y/T81Q-F | TGGAATCCGGGCAGTT <u>TAT</u> AGAC <u>AG</u> ATCACGTACTCCGGC |
| A79Y-T81Q-R | GCCGGAGTACGTGATC <u>TGT</u> CT <u>ATA</u> ACTGCCCCGGATTCCA |

The underline indicates the mutated sites
